# Supplementary material
Source: PubMed Central journal article supplement (PMC4707060)

**A**

**Vehicle**

**ML264  
(2 x 25 mg/kg)**

**KLF5 #1**

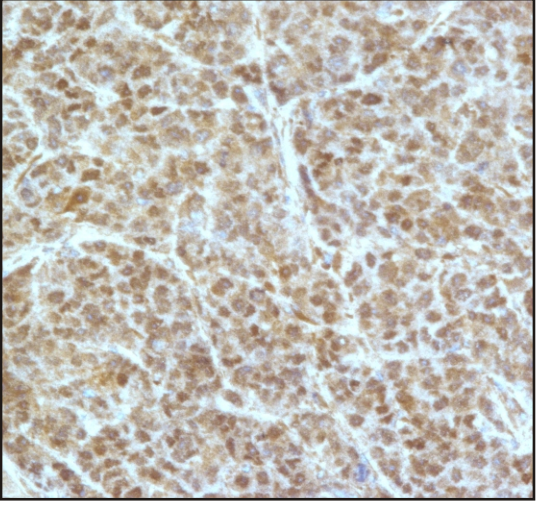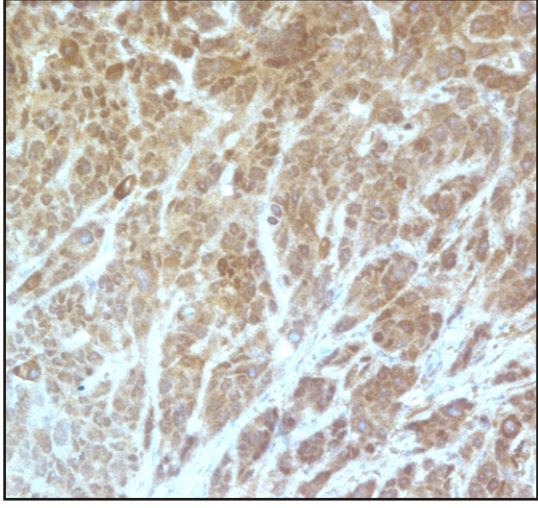

**KLF5 #2**

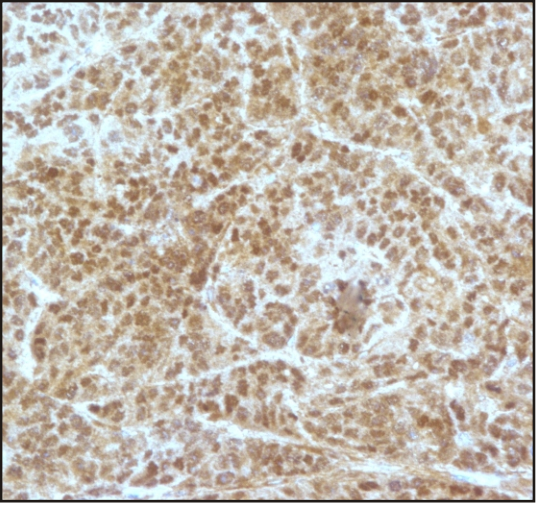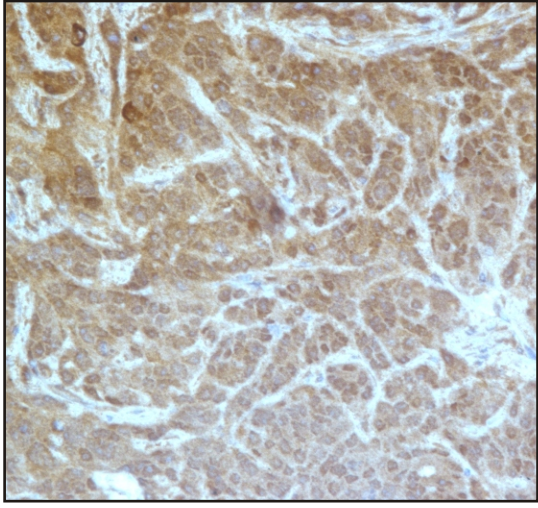

**KLF5 #3**

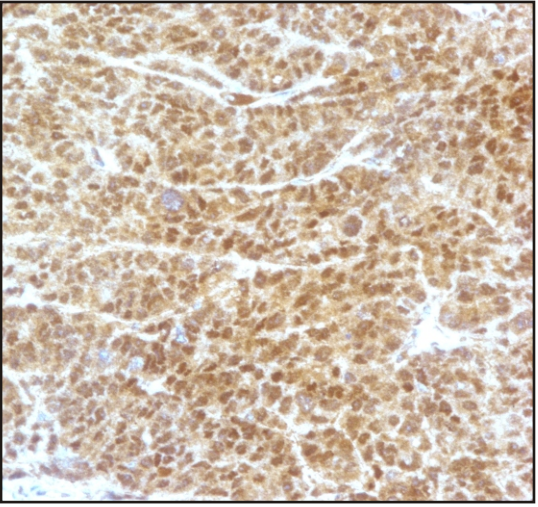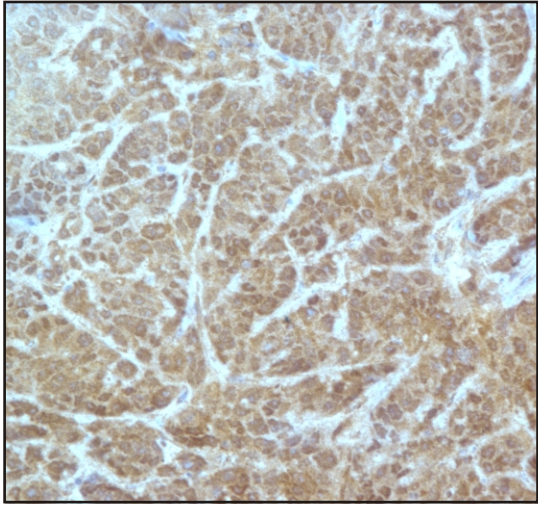

**Supplementary Figure 2.**

Supplement: NIHMS734188-supplement-3.pdf [file NIHMS734188-supplement-3.pdf]

**A**

**Vehicle**

**ML264  
(2 x 25 mg/kg)**

**EGR-1 #1**

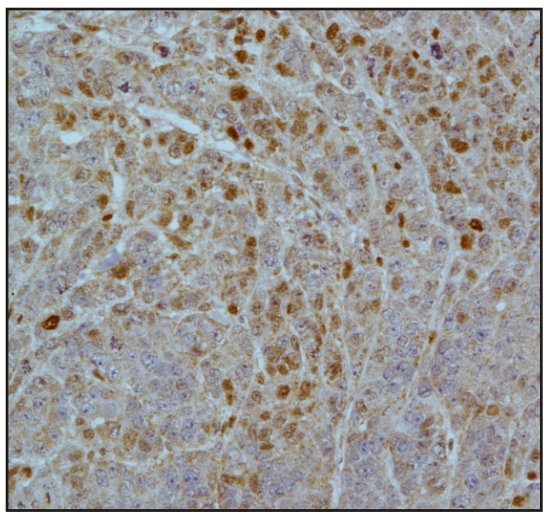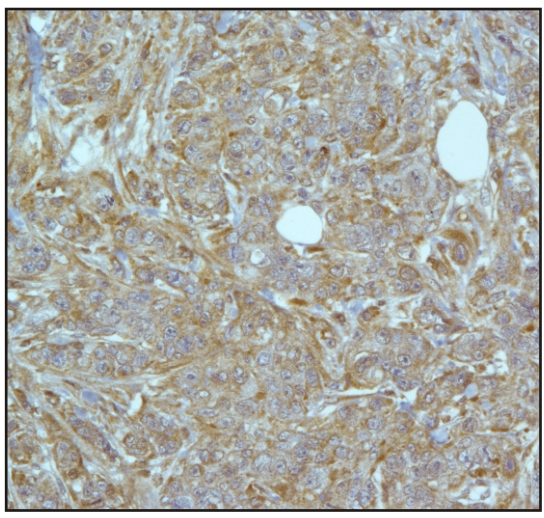

**EGR-1 #2**

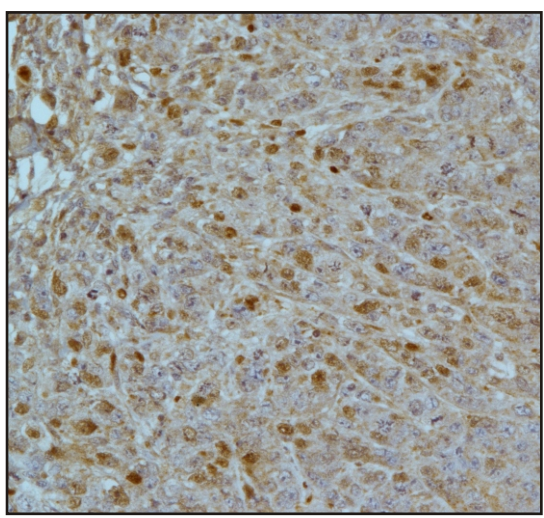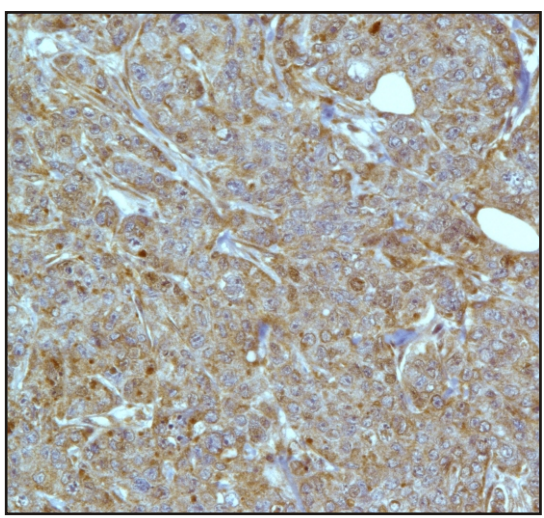

**EGR-1 #3**

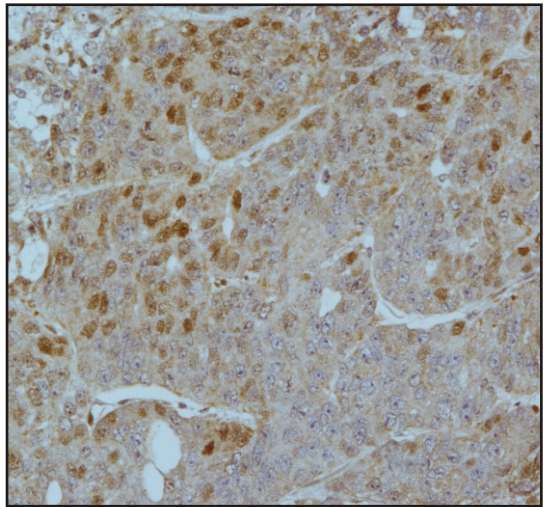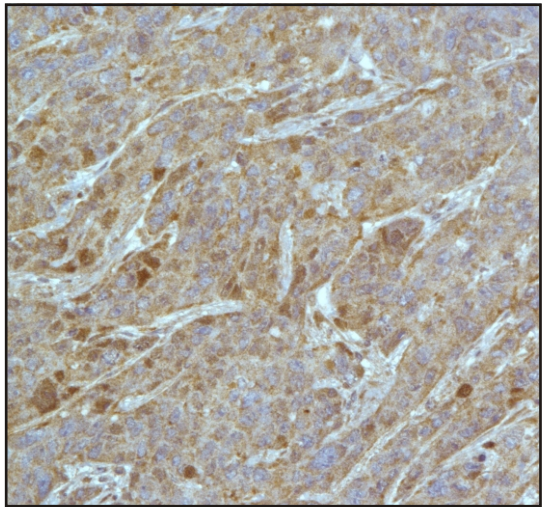

**Supplementary Figure 3.**

Supplement: NIHMS734188-supplement-4.pdf [file NIHMS734188-supplement-4.pdf]
